# Supplementary material for: Bioinformatics on the Road: Taking Training to Students and Researchers Beyond State Capitals
Source: Frontiers journal article supplement (doi:10.3389/feduc.2021.726930), 2021-11-17
Supplement: Table_1.DOCX [file Table_1.DOCX]

Table 1. List of events and syllabus presented to participants.

| **Event** | **Content** |
| --- | --- |
| Computational Biology Applied to Agribusiness Meeting | Computational Biology: Applications and Trends  (Lecture, Dr. Rommel Ramos)    Transfer of Antibiotic Resistance between Environment and Man  (Lecture, Dr. Rafael Baraúna)    Applying the One Health Concept to Microbacteria Research  (Lecture, Dr. Ana Fusco)    Computational Intelligence and its Integration with Agricultural Sciences  (Lecture, Dr. Rodrigo Lisbôa)    The Use of Artificial Neural Networks in Forest Sciences  (Lecture, Dr. Jonas Castro)    Bioinformatics and Agribusiness  (Lecture, Dr. Marcus Braga) |
| Bioinformatics and Biotechnology Workshops | Bioinformatics, Computational Biology and Agro  (Lecture, Dr. Rommel Ramos)    The Role of Bioinformatics in Biodiversity Research and Conservation  (Lecture, Dr. Igor Hamoy)    DNA Sequencing Technologies  (Lecture, Msc. Heitor Bastos)    The Impact of the Use of Bioinformatics and Biotechnology on the Amazon Agricultural Sector  (Panel, Dr. Rommel Ramos, Dr. Marcus Braga, Dr. Igor Hamoy)    AgroTech Revolution: The Future of Agribusiness Through Computing  (Lecture, Dr. Allan Costa)    Parasitic Fauna in Fish in the Amazon Region  (Lecture, Dr. Lilian Dias)    Development of Genomic Solutions for Agribusiness in the Amazon  (Lecture, Dr. Adriana Carneiro)    Deep Learning in Agricultural Sciences  (Lecture, Dr. Marcus Braga)    Bioinformatics Practice: Comparative Genomics  (Hands-on practical workshop, Dr. Luís Guimarães)    Bench Practice: Microbial Diversity Associated with Soil Analysis  (Practical workshop, Dr. Adriana Carneiro) |
| Training in Bioinformatics - Belém Stage | Introduction to the Linux Environment  (Hands-on practical workshop, student Sebatião Neto)    Introduction to Programming with Python  (Hands-on practical workshop, student Lucas Pompeu)    Genome Assembly  (Hands-on practical workshop, Dr. Frabricio Araujo)    Transcriptomic Data Analysis: RNA-Seq  (Hands-on practical workshop, Dr. Kenny Pinheiro)    Machine Learning Techniques: Clustering  (Hands-on practical workshop, Msc. Edian Franco) |
| International Events - Dominican Republic | Bacterial Resistome: form wet laboratory to computational biology  (Practical workshop, Dr. Rommel Ramos, Dr. Rafael Baraúna, Msc. Edian Franco)    Computational Biology  (Lecture, Dr. Rommel Ramos)    Challenges of Bioinformatics and Computational Biology in the Dominican Republic (Lecture, Msc. Edian Franco)    Bioinformatics and computational biology as new tools to face the Dominican Republic crisis  (Lecture, Msc. Edian Franco) |
